# Supplementary material for: N439K Variant in Spike Protein Alter the Infection Efficiency and Antigenicity of SARS-CoV-2 Based on Molecular Dynamics Simulation
Source: PubMed Central journal article supplement (PMC8369991; doi:10.3389/fcell.2021.697035), 2021-08-03

# Supplementary File S2

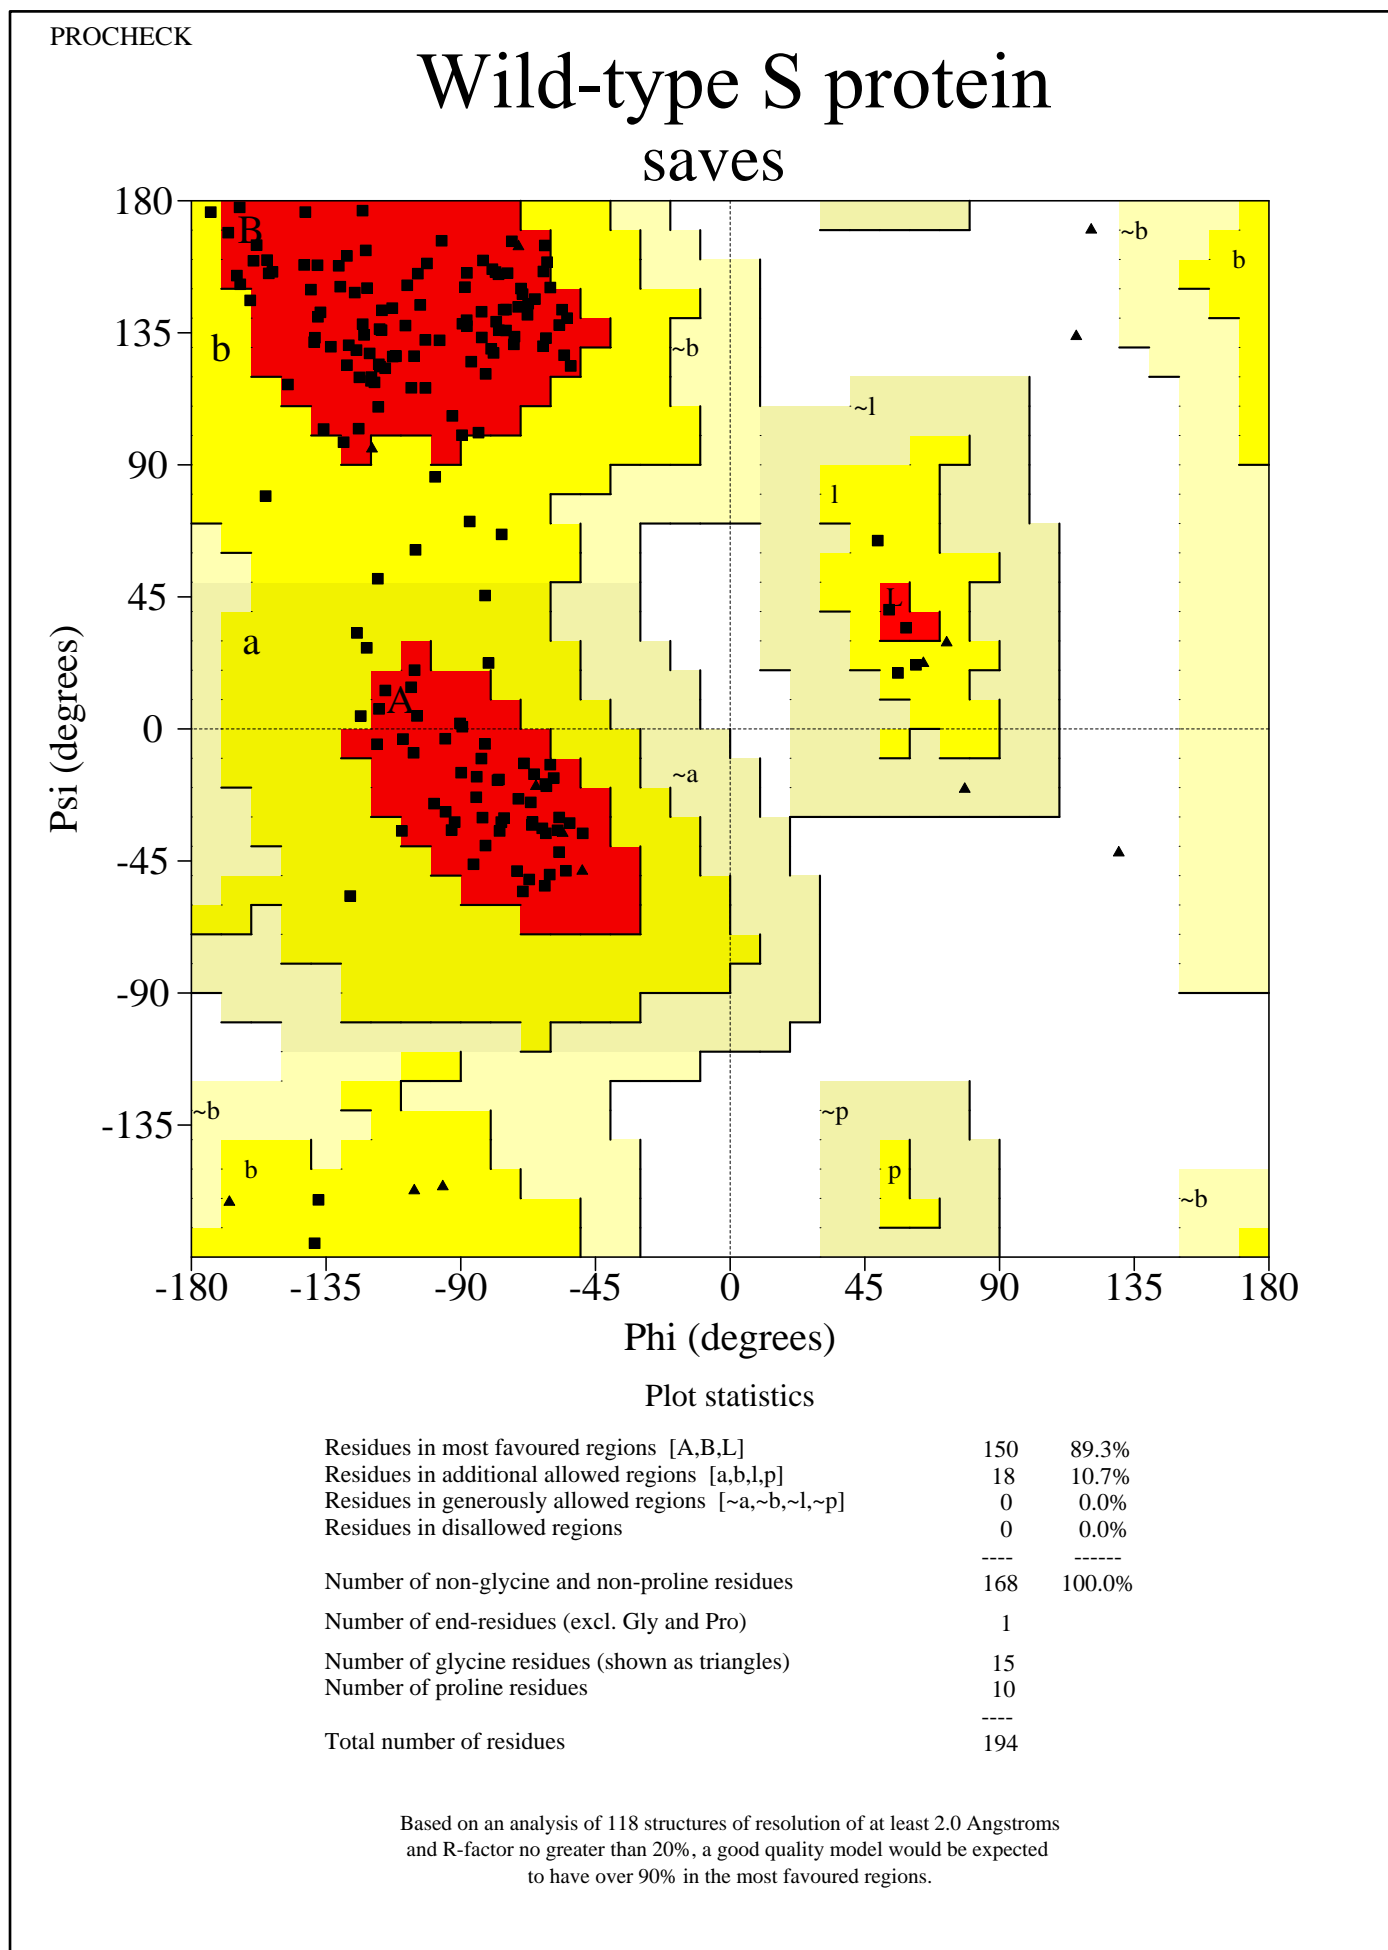

# N439K S protein

saves

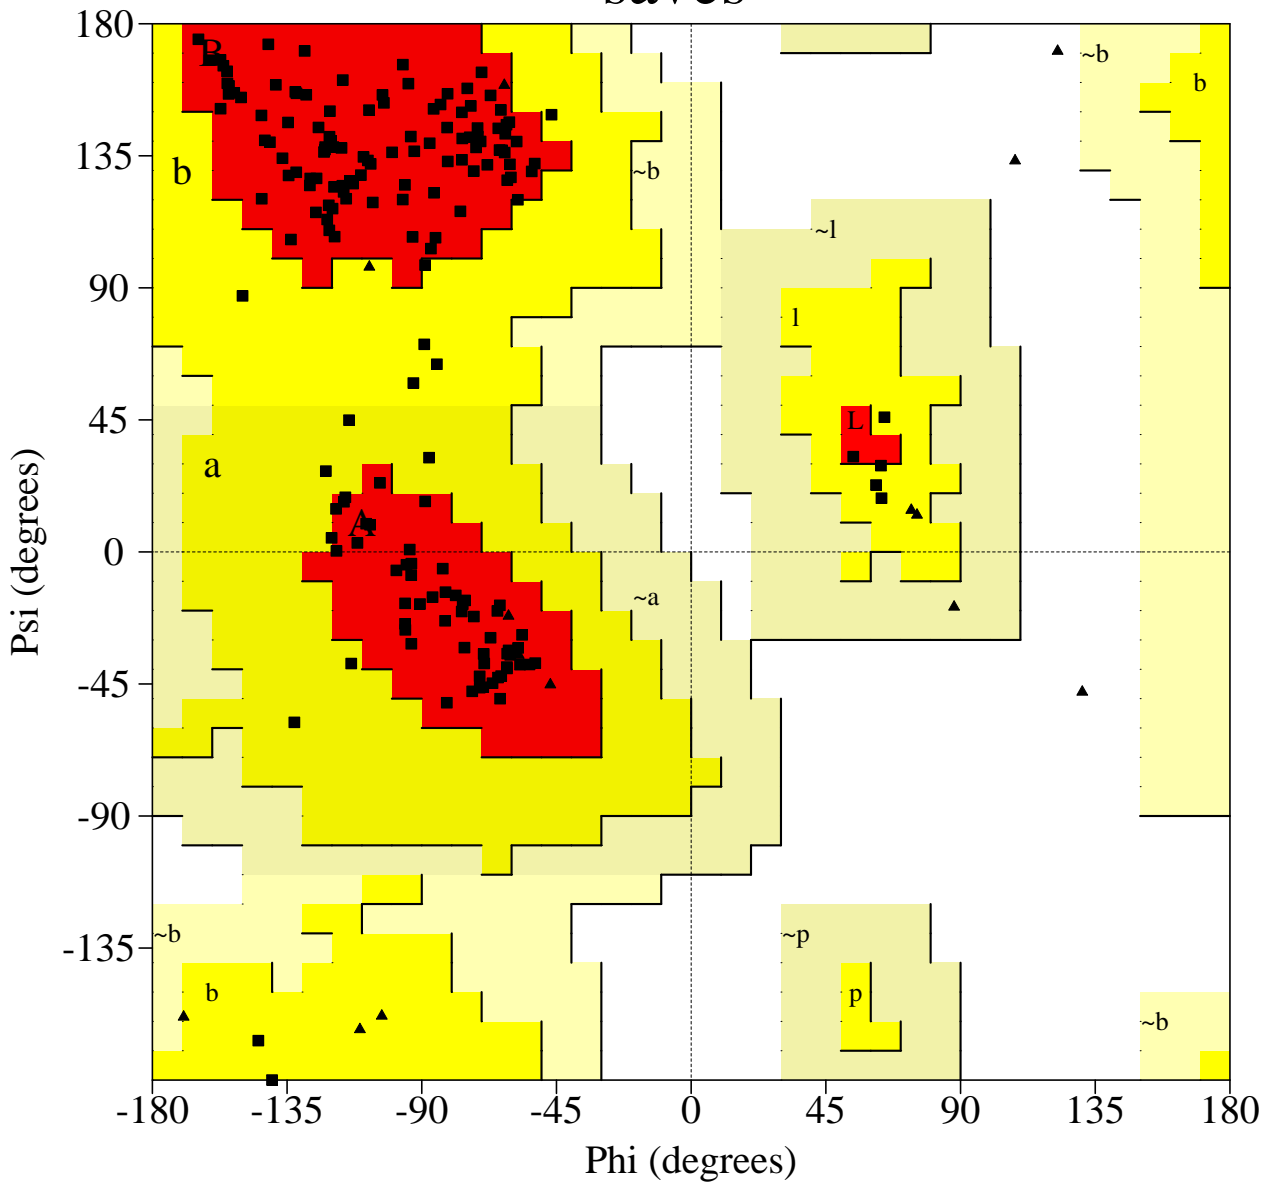

Plot statistics

|                                                      |     |        |
|------------------------------------------------------|-----|--------|
| Residues in most favoured regions [A,B,L]            | 152 | 90.5%  |
| Residues in additional allowed regions [a,b,l,p]     | 16  | 9.5%   |
| Residues in generously allowed regions [~a,~b,~l,~p] | 0   | 0.0%   |
| Residues in disallowed regions                       | 0   | 0.0%   |
| -----                                                |     |        |
| Number of non-glycine and non-proline residues       | 168 | 100.0% |
| Number of end-residues (excl. Gly and Pro)           | 1   |        |
| Number of glycine residues (shown as triangles)      | 15  |        |
| Number of proline residues                           | 10  |        |
| -----                                                |     |        |
| Total number of residues                             | 194 |        |

Based on an analysis of 118 structures of resolution of at least 2.0 Angstroms and R-factor no greater than 20%, a good quality model would be expected to have over 90% in the most favoured regions.

### A ANOLEA results of wild-type Spike protein

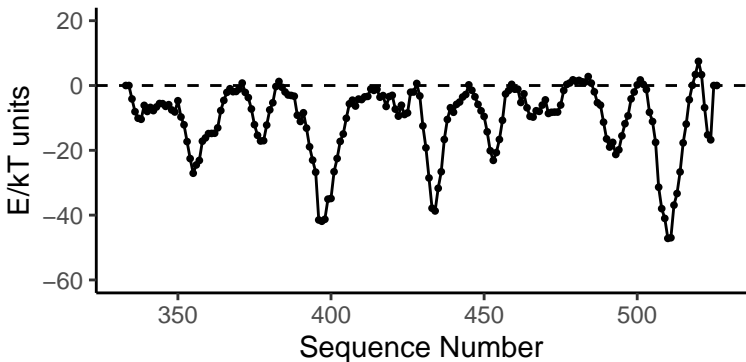

### B ANOLEA results of N439K Spike protein

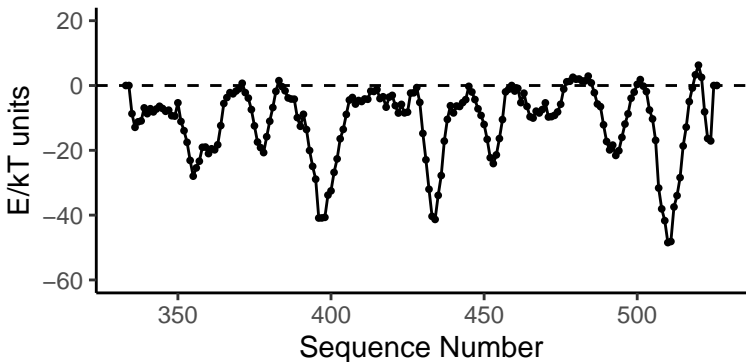

# Wild-type S protein

## Analysis of entire structure

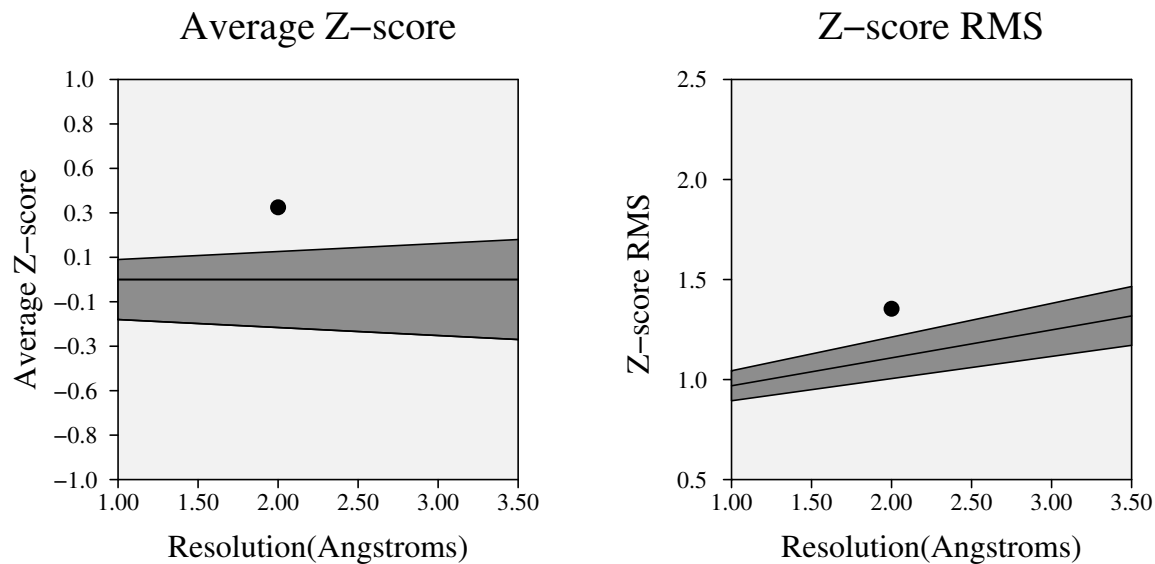

## Distribution of atomic Z-scores

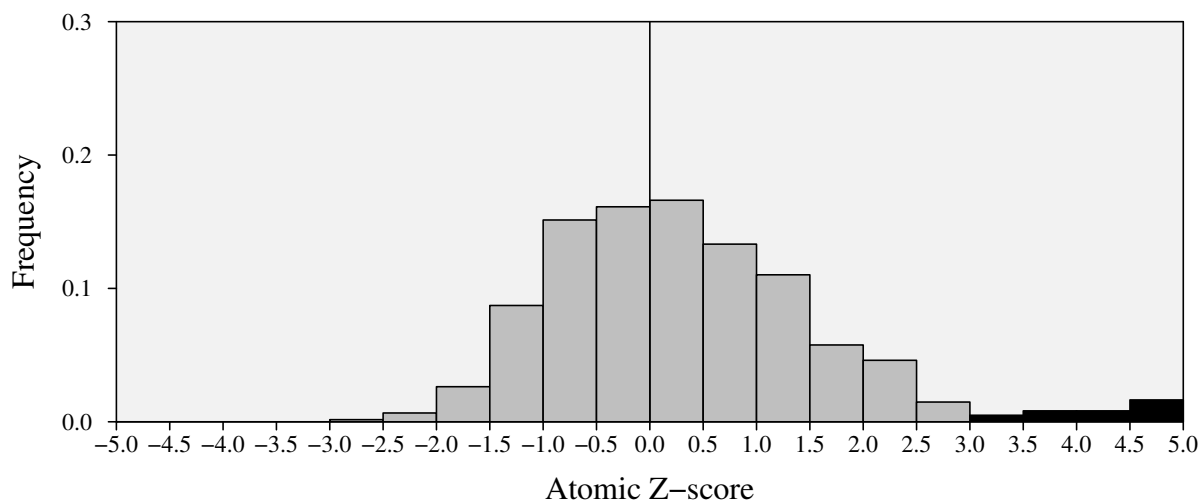

|                |       |
|----------------|-------|
| Z-score mean   | 0.361 |
| Z-score stddev | 1.306 |
| Z-score RMS    | 1.354 |
| # scored atoms | 680   |
| # outliers     | 25    |
| % outliers     | 3.700 |

# N439K S protein

## Analysis of entire structure

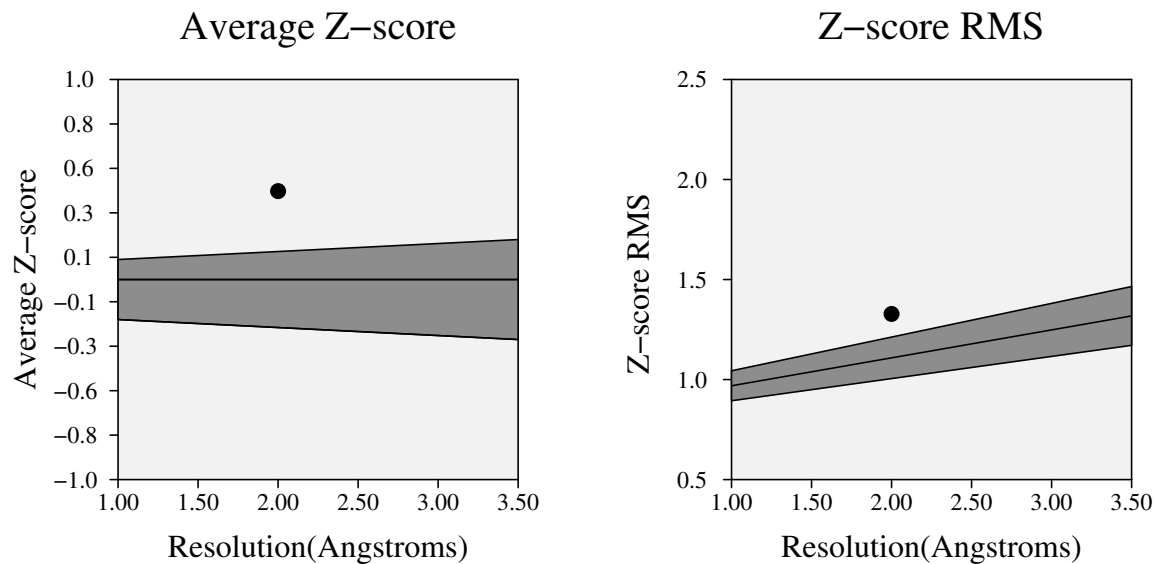

## Distribution of atomic Z-scores

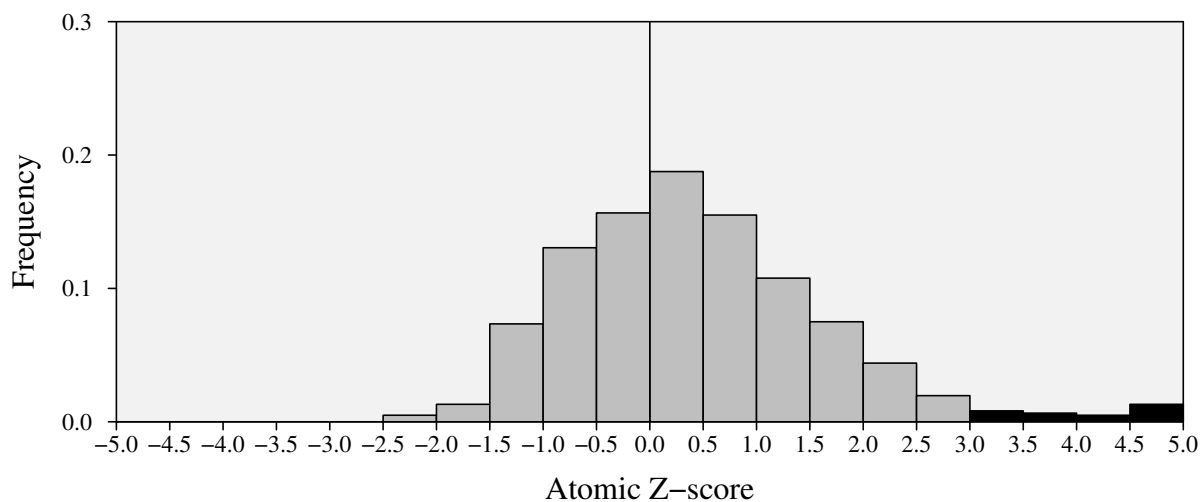

|                |       |
|----------------|-------|
| Z-score mean   | 0.442 |
| Z-score stddev | 1.254 |
| Z-score RMS    | 1.328 |
| # scored atoms | 686   |
| # outliers     | 23    |
| % outliers     | 3.400 |

## A Verify 3D plot of wild-type S protein

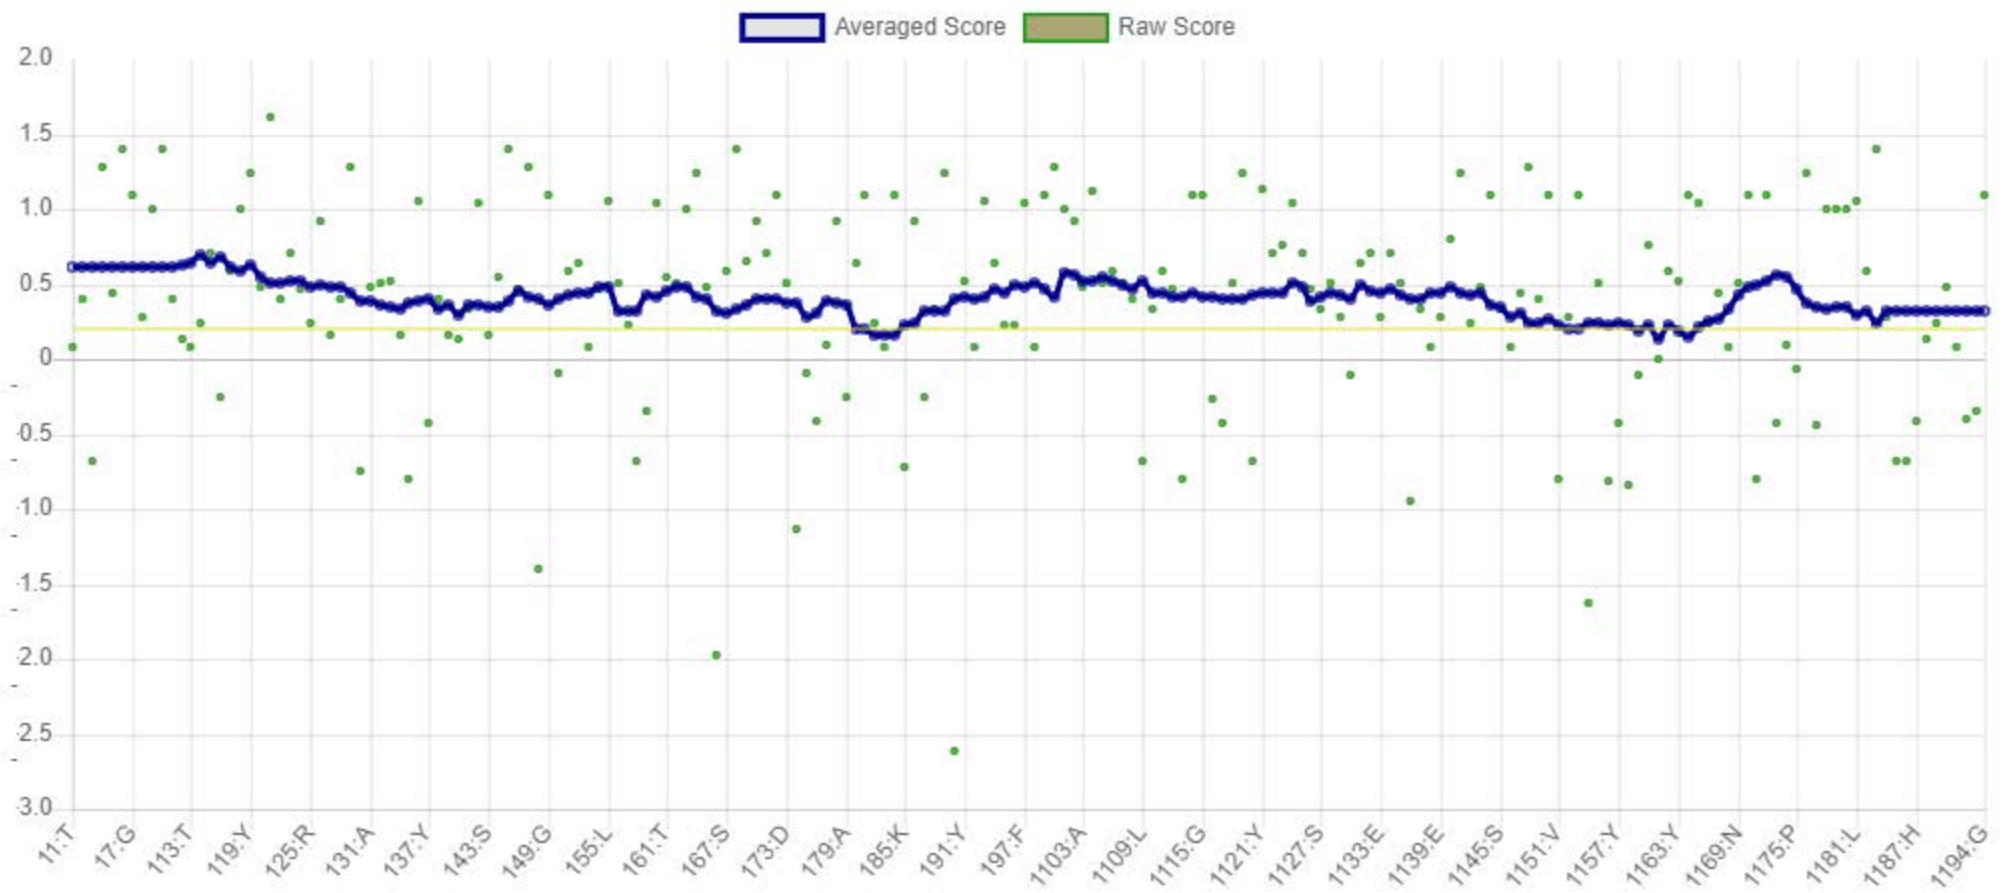

## B Verify 3D plot of N439K S protein

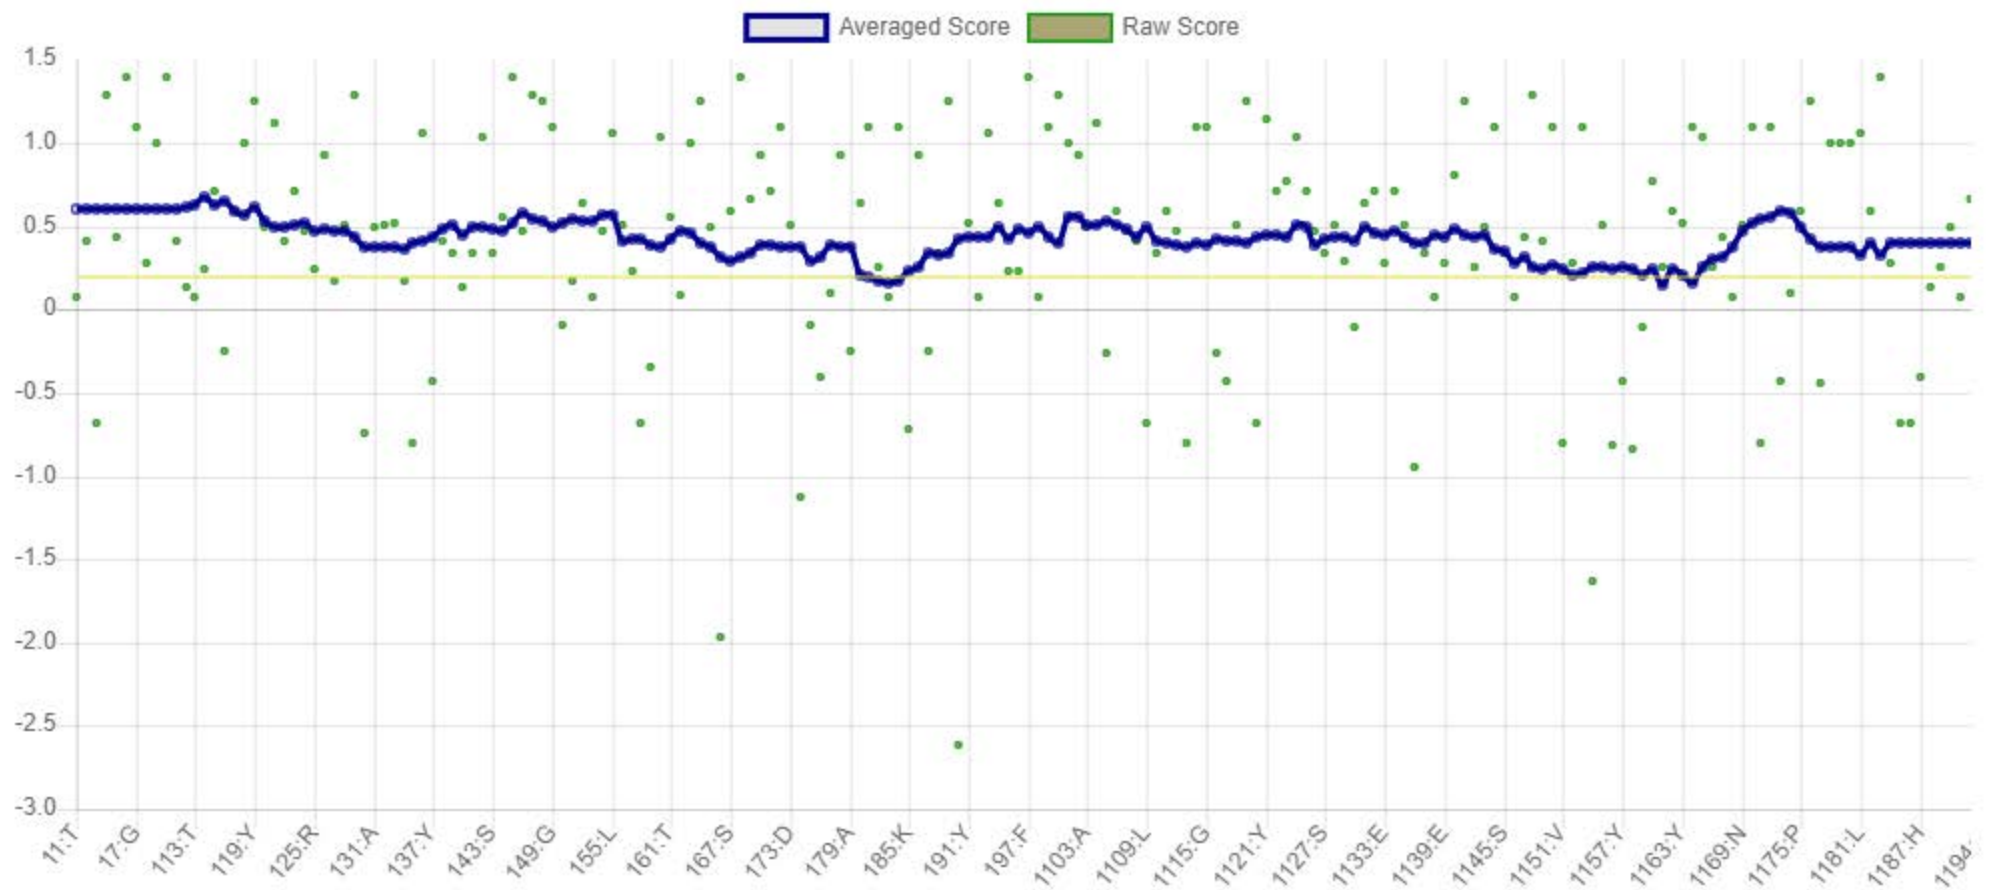

# The PROCHECK of wild-type S protein

## Summary

Ramachandran plot **Warning**

All Ramachandrans **Warning**

Chi1-chi2 plots **Pass**

Main-chain params

Side-chain params **Warning**

Residue properties **Pass**

Bond len/angle **Pass**

M/c bond lengths

M/c bond angles

Planar groups **Pass**

Program output

```
-----<<< P R O C H E C K   S U M M A R Y >>>-----
/var/www/SAVES/Jobs/638906/saves.pdb  1.5                194 residues
+ Ramachandran plot:  89.3% core   10.7% allow   0.0% gener   0.0% disall
+ All Ramachandrans:    2 labelled residues (out of 192)
+ Chi1-chi2 plots:     2 labelled residues (out of 115)
  Side-chain params:    5 better     0 inside     0 worse
+ Residue properties:  Max.deviation:    4.4                Bad contacts:    0
                      Bond len/angle:    2.2          Morris et al class:  1  2  2
G-factors              Dihedrals:  -0.27   Covalent:    0.52   Overall:    0.05
Planar groups:         100.0% within limits   0.0% highlighted
+ May be worth investigating further.  * Worth investigating further.
```

Summary file

# The PROCHECK of N439K S protein

Summary

Ramachandran plot **Warning**

All Ramachandrans **Warning**

Chi1-chi2 plots **Pass**

Main-chain params

Side-chain params **Warning**

Residue properties **Warning**

Bond len/angle **Warning**

M/c bond lengths

M/c bond angles

Planar groups **Warning**

Program output

```
-----<<< P R O C H E C K   S U M M A R Y >>>-----  
/var/www/SAVES/Jobs/638912/saves.pdb  1.5                194 residues  
Ramachandran plot:  90.5% core    9.5% allow    0.0% gener    0.0% disall  
+ All Ramachandrans:  3 labelled residues (out of 192)  
+ Chi1-chi2 plots:   2 labelled residues (out of 115)  
Side-chain params:  5 better     0 inside     0 worse  
+ Residue properties: Max.deviation:   4.5                Bad contacts:   0  
+                   Bond len/angle:  4.3      Morris et al class:  1  2  2  
G-factors           Dihedrals:  -0.25  Covalent:  -0.04  Overall:  -0.16  
+ Planar groups:     96.2% within limits  3.8% highlighted  1 off graph  
-----  
+ May be worth investigating further.  * Worth investigating further.
```

Summary file



# QMEAN of N439K\_S\_Protein

## Model Results 🔍

Order by: GMQE ▼



**Oligo-State**  
Monomer

**Ligands**  
None

**GMQE**  
0.87

**QMEAN**  
-1.66 🔗

**Global Quality Estimate**

QMEAN  -1.66

C $\beta$   0.17

All Atom  -1.59

solvation  -1.92

torsion  -0.90

**Local Quality Estimate**



Residue Number

**Comparison**



Protein Size (Residues)

| Template            | Seq Identity | Coverage                                                               | Description |
|---------------------|--------------|------------------------------------------------------------------------|-------------|
| template_upload.1.A | 99.48%       | <div style="width: 100%; height: 10px; background-color: blue;"></div> | Polypeptide |

**Model-Template Alignment**

|                     |                                                                   |     |
|---------------------|-------------------------------------------------------------------|-----|
| Model_01            | <b>TNLCPFGEVFNATRFASVYAWNRKRISNCVADYSVLYNSASFSTFKCYGVSP TKL</b>   | 55  |
| template_upload.1.A | TNLCPFGEVFNATRFASVYAWNRKRISNCVADYSVLYNSASFSTFKCYGVSP TKL          | 55  |
| Model_01            | <b>NDLCFTNVYADSFVIRGDEV RQIAPGQTGKIADYNYKLPDDFTGCVIAWNSKNLD</b>   | 110 |
| template_upload.1.A | NDLCFTNVYADSFVIRGDEV RQIAPGQTGKIADYNYKLPDDFTGCVIAWNSN NLD         | 110 |
| Model_01            | <b>SKVGGNYNYLYR LFRKSNLKPFFERDISTE IYQAGSTPCNGVEGFNCYFPLQSYGF</b> | 165 |
| template_upload.1.A | SKVGGNYNYLYR LFRKSNLKPFFERDISTE IYQAGSTPCNGVEGFNCYFPLQSYGF        | 165 |
| Model_01            | <b>QPTNGVGYQP YR VV VLSFELLHAPATVCG</b>                           | 194 |
| template_upload.1.A | QPTNGVGYQP YR VV VLSFELLHAPATVCG                                  | 194 |

Model 01 ▼

Structure Assessment

☰

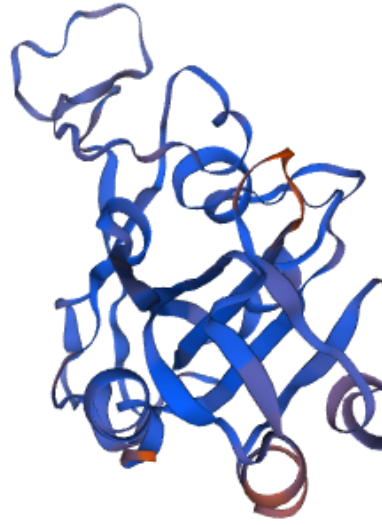

⚙️

Cartoon ▲

📷 ▲

▶

▲

🔄

1



Supplement: Data_Sheet_2.pdf [file Data_Sheet_2.pdf]
